# Supplementary material for: circ-LRP6 contributes to osteosarcoma progression by regulating the miR-141-3p/HDAC4/HMGB1 axis
Source: PubMed Central journal article supplement — Int J Oncol. 2022 Feb 23;60(4):38. doi: 10.3892/ijo.2022.5328 (PMC8878724; doi:10.3892/ijo.2022.5328), 2022-02-23

Figure S1. Reverse transcription-quantitative PCR analysis of circ-CCT2, circ-TRIM33, circ-EIF4G3 and circ-LRP6 expression levels in osteosarcoma (tumor) and normal paracancerous tissues. \*\*P<0.01, \*\*\*P<0.001. CCT2, chaperonin-containing TCP1 subunit 2; circ, circular RNA; EIF4G3, circ-eukaryotic translation initiation factor 4  $\gamma$ 3; LRP, lipoprotein receptor 6; TRIM33, tripartite motif-containing 33.

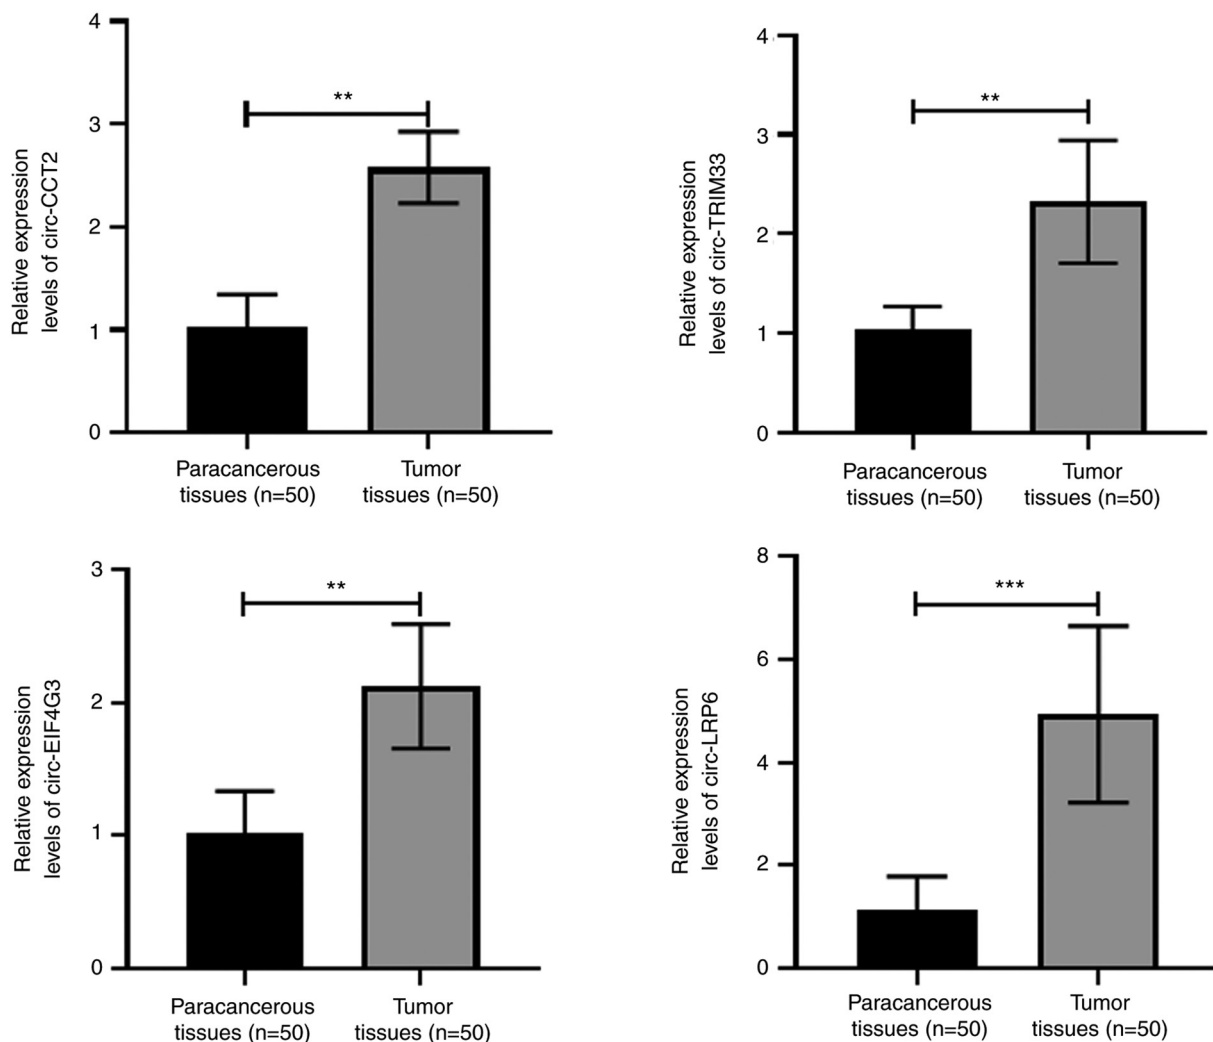

Figure S2. Circular RNA Interactome online tool prediction of four of the top five miRNAs that might interact with circ-LRP6. (A) Binding sites between circ-LRP6 and miR-1208. (B) Binding sites between circ-LRP6 and miR-326. (C) Binding sites between circ-LRP6 and miR-330-5p. (D) Binding sites between circ-LRP6 and miR-513a-3p. circ, circular RNA; LRP, lipoprotein receptor 6; miR, microRNA.

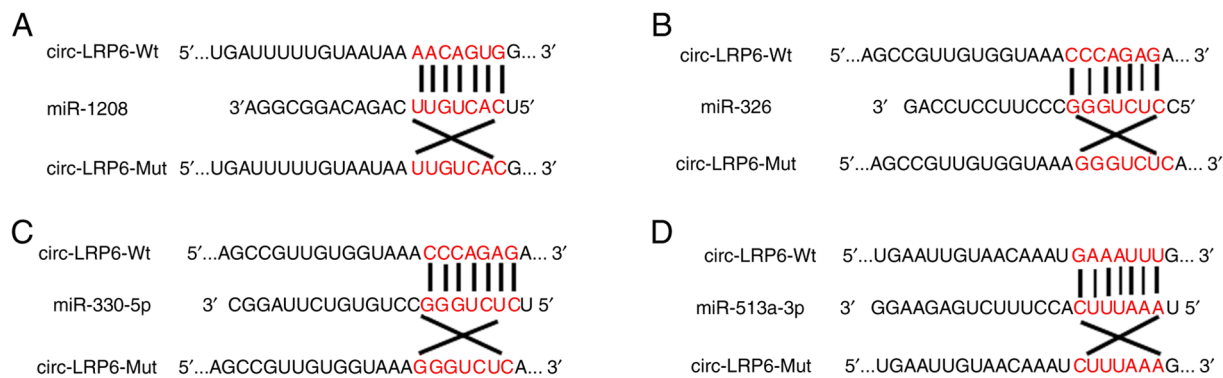

Supplement: Supplementary_Data.pdf [file Supplementary_Data.pdf]
